# Supplementary material
Source: MDPI journal article supplement (https://www.mdpi.com/2077-1312/9/11/1249)
Supplement: s1 [file s1]

Table S1: Raw data of the percentages (%) of planktonic foraminifera and pteropod species in downcore samples.

| <b>Species/Samples (cm)</b>           | <b>1,5</b> | <b>3</b> | <b>4,5</b> | <b>6,25</b> | <b>8</b> | <b>9</b> | <b>10</b> | <b>11,25</b> | <b>12,5</b> | <b>13,5</b> |
|---------------------------------------|------------|----------|------------|-------------|----------|----------|-----------|--------------|-------------|-------------|
| <i>Orbulina universa</i>              | 0,00       | 0,61     | 1,15       | 1,75        | 1,45     | 3,30     | 0,00      | 1,38         | 1,55        | 5,34        |
| <i>Globigerinoides ruber alba</i>     | 27,52      | 30,67    | 37,93      | 40,35       | 45,89    | 41,98    | 30,63     | 32,57        | 41,45       | 54,85       |
| <i>Globigerinoides ruber rosea</i>    | 8,05       | 11,04    | 6,32       | 12,28       | 8,21     | 8,02     | 11,26     | 11,93        | 19,69       | 17,48       |
| <i>Globigerinoides ruber</i>          | 0,00       | 0,00     | 0,00       | 0,00        | 0,00     | 0,47     | 0,00      | 2,29         | 2,07        | 3,40        |
| <i>Globorotalia inflata</i>           | 0,00       | 0,00     | 0,00       | 0,00        | 0,00     | 0,00     | 0,00      | 0,00         | 0,00        | 0,97        |
| <i>Globigerina bulloides</i> gr.      | 22,82      | 33,74    | 28,16      | 30,70       | 27,54    | 19,81    | 33,78     | 25,23        | 10,36       | 3,40        |
| <i>Globoturborotalita rubescens</i>   | 12,75      | 3,07     | 2,30       | 2,63        | 1,45     | 8,02     | 3,15      | 5,05         | 0,00        | 0,49        |
| <i>Globigerinella siphonifera</i> gr. | 0,00       | 1,23     | 2,87       | 0,88        | 3,38     | 0,00     | 1,35      | 5,96         | 1,55        | 0,49        |
| <i>Neogloboquadrina pachyderma</i>    | 4,70       | 6,75     | 6,90       | 0,00        | 2,90     | 0,94     | 3,15      | 8,26         | 14,51       | 12,62       |
| <i>Neogloboquadrina dutertrei</i>     | 0,00       | 2,45     | 0,00       | 0,00        | 0,00     | 0,00     | 0,00      | 0,00         | 0,00        | 0,00        |
| <i>Turborotalita quinqueloba</i>      | 19,46      | 9,82     | 13,79      | 10,53       | 8,70     | 15,09    | 16,22     | 9,17         | 8,29        | 0,97        |
| <i>Globigerinita glutinata</i>        | 4,70       | 0,61     | 0,57       | 0,88        | 0,48     | 2,36     | 0,45      | 0,46         | 0,00        | 0,00        |
| <i>Heliconoides inflatus</i>          | 0,00       | 5,06     | 4,29       | 10,67       | 5,98     | 10,97    | 6,61      | 6,85         | 9,52        | 21,30       |
| <i>Limacina retroversa</i>            | 0,00       | 0,00     | 0,00       | 0,00        | 0,00     | 0,00     | 0,00      | 0,00         | 0,00        | 5,56        |
| <i>Limacina trochiformis</i>          | 0,00       | 15,19    | 22,86      | 4,00        | 14,53    | 14,19    | 18,18     | 17,81        | 4,76        | 9,26        |
| <i>Boasia chierchiae</i>              | 0,00       | 18,99    | 11,43      | 13,33       | 14,53    | 25,81    | 7,44      | 12,33        | 4,76        | 8,33        |
| <i>Creseis acicula</i>                | 0,00       | 27,85    | 27,14      | 42,67       | 20,51    | 13,55    | 16,53     | 19,18        | 19,05       | 4,63        |
| <i>Styliola subula</i>                | 0,00       | 1,27     | 2,86       | 1,33        | 2,56     | 3,23     | 5,79      | 2,74         | 19,05       | 8,33        |
| <i>Clio cuspidata</i>                 | 0,00       | 0,00     | 0,00       | 0,00        | 0,85     | 1,94     | 0,83      | 0,00         | 0,00        | 0,93        |
| <i>Clio pyramidata</i>                | 0,00       | 15,19    | 10,00      | 10,67       | 24,79    | 8,39     | 12,40     | 21,92        | 33,33       | 15,74       |
| <i>Diacria trispinosa</i>             | 0,00       | 0,00     | 0,00       | 0,00        | 0,00     | 0,00     | 0,00      | 0,00         | 0,00        | 0,00        |
| <i>Cavolinia</i> spp.                 | 0,00       | 5,06     | 2,86       | 5,33        | 8,55     | 9,03     | 9,09      | 10,96        | 9,52        | 9,26        |

| <b>Species/Samples (cm)</b>           | <b>14,5</b> | <b>15,5</b> | <b>17</b> | <b>19</b> | <b>20,5</b> | <b>21,5</b> | <b>23</b> | <b>25</b> | <b>27</b> | <b>29</b> |
|---------------------------------------|-------------|-------------|-----------|-----------|-------------|-------------|-----------|-----------|-----------|-----------|
| <i>Orbulina universa</i>              | 4,88        | 2,16        | 0,97      | 4,40      | 0,88        | 1,01        | 2,42      | 0,86      | 0,91      | 1,56      |
| <i>Globigerinoides ruber alba</i>     | 40,49       | 41,62       | 48,31     | 60,44     | 50,66       | 45,73       | 46,38     | 45,26     | 54,09     | 39,45     |
| <i>Globigerinoides ruber rosea</i>    | 31,22       | 21,08       | 15,46     | 4,40      | 13,66       | 18,59       | 21,74     | 11,64     | 15,00     | 6,25      |
| <i>Globigerinoides ruber</i>          | 3,90        | 5,95        | 2,42      | 3,85      | 4,85        | 2,51        | 0,00      | 3,02      | 5,00      | 2,34      |
| <i>Globorotalia inflata</i>           | 0,49        | 1,62        | 0,00      | 0,00      | 0,00        | 0,00        | 0,00      | 0,00      | 0,00      | 0,00      |
| <i>Globigerina bulloides</i> gr.      | 0,98        | 8,11        | 7,25      | 13,19     | 12,33       | 11,56       | 9,66      | 18,10     | 10,45     | 12,89     |
| <i>Globoturborotalita rubescens</i>   | 0,00        | 1,62        | 5,80      | 0,00      | 1,76        | 2,01        | 0,97      | 3,02      | 1,36      | 3,52      |
| <i>Globigerinella siphonifera</i> gr. | 0,98        | 1,62        | 4,83      | 2,20      | 4,41        | 5,03        | 3,38      | 2,59      | 2,73      | 3,52      |
| <i>Neogloboquadrina pachyderma</i>    | 17,07       | 12,43       | 5,31      | 9,89      | 0,88        | 2,01        | 7,25      | 3,88      | 2,73      | 1,95      |
| <i>Neogloboquadrina dutertrei</i>     | 0,00        | 1,08        | 0,00      | 0,55      | 0,00        | 0,00        | 2,42      | 0,00      | 0,00      | 0,00      |
| <i>Turborotalita quinqueloba</i>      | 0,00        | 2,16        | 10,63     | 1,10      | 11,89       | 12,56       | 4,83      | 11,64     | 7,27      | 28,13     |
| <i>Globigerinita glutinata</i>        | 0,00        | 0,00        | 0,97      | 0,00      | 0,44        | 1,01        | 0,97      | 0,00      | 0,45      | 0,39      |
| <i>Heliconoides inflatus</i>          | 18,71       | 9,20        | 8,54      | 9,00      | 5,16        | 8,33        | 11,93     | 8,82      | 9,04      | 11,11     |
| <i>Limacina retroversa</i>            | 0,00        | 2,30        | 0,00      | 21,00     | 0,00        | 0,00        | 1,83      | 0,00      | 0,60      | 0,00      |
| <i>Limacina trochiformis</i>          | 5,76        | 11,49       | 24,39     | 2,00      | 12,90       | 15,63       | 8,26      | 13,24     | 26,51     | 22,22     |
| <i>Boasia chierchiae</i>              | 0,00        | 13,79       | 6,10      | 4,00      | 27,74       | 14,58       | 9,17      | 13,24     | 7,23      | 0,00      |
| <i>Creseis acicula</i>                | 8,63        | 5,75        | 7,32      | 6,00      | 9,03        | 13,54       | 12,84     | 2,94      | 7,23      | 0,00      |
| <i>Styliola subula</i>                | 6,47        | 18,39       | 12,20     | 4,00      | 4,52        | 8,33        | 9,17      | 8,82      | 5,42      | 0,00      |
| <i>Clio cuspidata</i>                 | 1,44        | 0,00        | 1,22      | 1,00      | 1,29        | 0,00        | 0,00      | 0,00      | 0,60      | 0,00      |
| <i>Clio pyramidata</i>                | 21,58       | 17,24       | 18,29     | 24,00     | 14,19       | 19,79       | 16,51     | 22,06     | 13,25     | 66,67     |
| <i>Diacria trispinosa</i>             | 0,00        | 0,00        | 0,00      | 0,00      | 0,00        | 0,00        | 0,00      | 0,00      | 0,00      | 0,00      |
| <i>Cavolinia</i> spp.                 | 17,99       | 11,49       | 12,20     | 13,00     | 13,55       | 7,29        | 12,84     | 11,76     | 16,87     | 0,00      |

| <b>Species/Samples (cm)</b>           | <b>31</b> | <b>33</b> | <b>35</b> | <b>37</b> | <b>39</b> | <b>41</b> | <b>43</b> | <b>45</b> | <b>47</b> | <b>49</b> |
|---------------------------------------|-----------|-----------|-----------|-----------|-----------|-----------|-----------|-----------|-----------|-----------|
| <i>Orbulina universa</i>              | 1,19      | 0,45      | 1,91      | 0,44      | 0,42      | 0,85      | 1,99      | 2,11      | 0,42      | 2,11      |
| <i>Globigerinoides ruber alba</i>     | 45,24     | 39,19     | 26,32     | 33,19     | 42,37     | 41,28     | 41,83     | 65,82     | 54,39     | 48,95     |
| <i>Globigerinoides ruber rosea</i>    | 9,92      | 9,01      | 9,09      | 9,29      | 10,17     | 10,21     | 9,96      | 6,75      | 9,21      | 8,02      |
| <i>Globigerinoides ruber</i>          | 1,19      | 1,80      | 2,87      | 4,87      | 5,93      | 2,98      | 3,98      | 2,95      | 6,69      | 2,53      |
| <i>Globorotalia inflata</i>           | 0,00      | 0,00      | 0,00      | 0,44      | 0,00      | 0,00      | 0,00      | 0,00      | 0,00      | 0,00      |
| <i>Globigerina bulloides</i> gr.      | 8,33      | 9,46      | 18,18     | 9,73      | 7,63      | 10,64     | 11,55     | 10,13     | 12,97     | 12,66     |
| <i>Globoturborotalita rubescens</i>   | 1,59      | 1,35      | 0,48      | 1,77      | 2,54      | 2,55      | 5,18      | 1,69      | 3,35      | 9,28      |
| <i>Globigerinella siphonifera</i> gr. | 6,75      | 9,01      | 6,22      | 2,65      | 5,51      | 2,55      | 5,18      | 2,11      | 7,11      | 6,33      |
| <i>Neogloboquadrina pachyderma</i>    | 2,38      | 0,90      | 5,26      | 1,77      | 3,81      | 1,28      | 1,59      | 0,00      | 0,00      | 0,00      |
| <i>Neogloboquadrina dutertrei</i>     | 0,00      | 0,00      | 0,00      | 0,00      | 0,00      | 0,00      | 0,00      | 0,00      | 0,00      | 0,00      |
| <i>Turborotalita quinqueloba</i>      | 25,79     | 31,53     | 32,06     | 35,40     | 23,73     | 27,66     | 21,12     | 8,44      | 6,69      | 10,97     |
| <i>Globigerinita glutinata</i>        | 0,79      | 1,35      | 0,00      | 0,00      | 0,00      | 0,00      | 0,00      | 0,00      | 1,26      | 1,27      |
| <i>Heliconoides inflatus</i>          | 6,17      | 10,98     | 12,94     | 16,48     | 10,98     | 8,70      | 3,13      | 4,39      | 0,00      | 6,67      |
| <i>Limacina retroversa</i>            | 0,00      | 0,00      | 0,00      | 0,00      | 0,00      | 0,72      | 0,00      | 0,00      | 0,00      | 0,00      |
| <i>Limacina trochiformis</i>          | 28,40     | 25,61     | 25,88     | 17,61     | 22,36     | 21,01     | 23,96     | 7,89      | 0,00      | 25,00     |
| <i>Boasia chierchiae</i>              | 9,88      | 0,00      | 5,88      | 13,64     | 21,14     | 11,59     | 3,13      | 2,63      | 0,00      | 8,33      |
| <i>Creseis acicula</i>                | 3,70      | 1,22      | 8,24      | 1,70      | 4,07      | 5,80      | 6,25      | 20,18     | 0,00      | 3,33      |
| <i>Styliola subula</i>                | 12,35     | 7,32      | 7,06      | 10,80     | 15,04     | 15,94     | 26,04     | 27,19     | 0,00      | 16,67     |
| <i>Clio cuspidata</i>                 | 1,23      | 4,88      | 1,18      | 1,14      | 0,41      | 1,45      | 1,04      | 0,88      | 0,00      | 5,00      |
| <i>Clio pyramidata</i>                | 17,28     | 23,17     | 20,00     | 14,77     | 8,54      | 18,84     | 18,75     | 26,32     | 0,00      | 23,33     |
| <i>Diacria trispinosa</i>             | 0,00      | 0,00      | 1,18      | 0,00      | 0,00      | 0,00      | 1,04      | 0,00      | 0,00      | 0,00      |
| <i>Cavolinia</i> spp.                 | 9,88      | 6,10      | 12,94     | 9,09      | 9,35      | 9,42      | 10,42     | 5,26      | 0,00      | 5,00      |

| <b>Species/Samples (cm)</b>           | <b>51</b> | <b>53</b> | <b>55</b> | <b>57</b> | <b>59</b> | <b>61</b> | <b>63</b> | <b>65</b> | <b>67</b> | <b>69</b> |
|---------------------------------------|-----------|-----------|-----------|-----------|-----------|-----------|-----------|-----------|-----------|-----------|
| <i>Orbulina universa</i>              | 0,00      | 0,39      | 1,67      | 1,88      | 0,00      | 0,00      | 0,43      | 0,00      | 0,48      | 1,03      |
| <i>Globigerinoides ruber alba</i>     | 46,31     | 49,41     | 37,92     | 39,47     | 37,59     | 13,37     | 47,86     | 44,24     | 48,56     | 50,00     |
| <i>Globigerinoides ruber rosea</i>    | 11,07     | 6,67      | 8,33      | 12,03     | 6,57      | 11,05     | 16,24     | 8,76      | 8,65      | 10,31     |
| <i>Globigerinoides ruber</i>          | 1,23      | 0,78      | 1,25      | 0,38      | 2,19      | 0,00      | 0,85      | 0,92      | 1,92      | 0,52      |
| <i>Globorotalia inflata</i>           | 0,00      | 0,39      | 0,00      | 0,00      | 0,00      | 0,00      | 0,00      | 0,00      | 0,00      | 0,00      |
| <i>Globigerina bulloides</i> gr.      | 20,08     | 24,31     | 20,42     | 21,80     | 19,71     | 22,09     | 9,40      | 28,57     | 21,63     | 12,89     |
| <i>Globoturborotalita rubescens</i>   | 6,56      | 3,92      | 4,58      | 5,26      | 7,30      | 31,40     | 4,27      | 5,07      | 5,77      | 4,64      |
| <i>Globigerinella siphonifera</i> gr. | 8,20      | 2,35      | 7,08      | 1,88      | 6,57      | 2,91      | 7,26      | 1,84      | 2,40      | 6,19      |
| <i>Neogloboquadrina pachyderma</i>    | 0,00      | 1,57      | 4,17      | 0,00      | 1,82      | 0,00      | 0,00      | 2,30      | 0,00      | 1,03      |
| <i>Neogloboquadrina dutertrei</i>     | 0,00      | 0,39      | 0,00      | 0,00      | 0,00      | 0,00      | 0,00      | 0,00      | 0,00      | 0,00      |
| <i>Turborotalita quinqueloba</i>      | 9,84      | 9,02      | 17,50     | 17,67     | 20,44     | 15,70     | 14,53     | 6,45      | 5,77      | 11,86     |
| <i>Globigerinita glutinata</i>        | 0,41      | 0,78      | 0,00      | 0,38      | 0,00      | 3,49      | 1,28      | 1,84      | 4,81      | 3,61      |
| <i>Heliconoides inflatus</i>          | 0,00      | 8,89      | 4,86      | 0,00      | 0,00      | 14,29     | 7,41      | 28,57     | 7,69      | 10,40     |
| <i>Limacina retroversa</i>            | 0,00      | 0,00      | 0,00      | 0,00      | 0,00      | 0,00      | 0,00      | 0,00      | 0,00      | 0,00      |
| <i>Limacina trochiformis</i>          | 0,00      | 12,06     | 12,97     | 0,00      | 0,00      | 23,81     | 62,96     | 42,86     | 76,92     | 32,00     |
| <i>Boasia chierchiae</i>              | 0,00      | 10,48     | 9,19      | 0,00      | 0,00      | 14,29     | 3,70      | 0,00      | 0,00      | 14,40     |
| <i>Creseis acicula</i>                | 0,00      | 12,38     | 15,68     | 0,00      | 0,00      | 4,76      | 0,00      | 0,00      | 0,00      | 9,60      |
| <i>Styliola subula</i>                | 0,00      | 35,87     | 28,65     | 0,00      | 0,00      | 9,52      | 0,00      | 0,00      | 0,00      | 0,00      |
| <i>Clio cuspidata</i>                 | 0,00      | 0,95      | 2,16      | 0,00      | 0,00      | 2,38      | 0,00      | 14,29     | 0,00      | 0,00      |
| <i>Clio pyramidata</i>                | 0,00      | 10,79     | 15,14     | 0,00      | 0,00      | 7,14      | 11,11     | 0,00      | 0,00      | 3,20      |
| <i>Diacria trispinosa</i>             | 0,00      | 0,00      | 0,00      | 0,00      | 0,00      | 0,00      | 0,00      | 0,00      | 0,00      | 0,00      |
| <i>Cavolinia</i> spp.                 | 0,00      | 2,22      | 2,70      | 0,00      | 0,00      | 4,76      | 7,41      | 0,00      | 7,69      | 12,00     |

| <b>Species/Samples (cm)</b>           | <b>71</b> | <b>73</b> | <b>75</b> | <b>77</b> | <b>79</b> | <b>81</b> | <b>83</b> | <b>85</b> | <b>87</b> | <b>89</b> |
|---------------------------------------|-----------|-----------|-----------|-----------|-----------|-----------|-----------|-----------|-----------|-----------|
| <i>Orbulina universa</i>              | 2,46      | 0,85      | 2,31      | 1,70      | 0,46      | 0,44      | 0,00      | 1,80      | 0,79      | 0,45      |
| <i>Globigerinoides ruber alba</i>     | 59,84     | 57,87     | 54,17     | 44,26     | 35,78     | 36,89     | 35,98     | 33,53     | 36,36     | 43,05     |
| <i>Globigerinoides ruber rosea</i>    | 7,38      | 2,55      | 10,65     | 14,89     | 12,84     | 18,22     | 20,83     | 18,56     | 27,67     | 22,42     |
| <i>Globigerinoides ruber</i>          | 2,87      | 1,70      | 2,78      | 1,70      | 1,83      | 4,89      | 3,03      | 0,00      | 2,37      | 1,35      |
| <i>Globorotalia inflata</i>           | 0,00      | 0,00      | 0,00      | 0,00      | 0,00      | 0,44      | 0,00      | 0,00      | 0,00      | 0,00      |
| <i>Globigerina bulloides</i> gr.      | 11,07     | 17,02     | 9,72      | 17,02     | 20,18     | 21,33     | 21,21     | 17,37     | 16,60     | 16,14     |
| <i>Globoturborotalita rubescens</i>   | 2,05      | 2,55      | 3,70      | 5,11      | 5,50      | 4,44      | 5,68      | 12,57     | 7,91      | 5,38      |
| <i>Globigerinella siphonifera</i> gr. | 6,56      | 2,13      | 5,56      | 3,83      | 4,13      | 2,67      | 4,92      | 2,40      | 1,58      | 4,93      |
| <i>Neogloboquadrina pachyderma</i>    | 1,23      | 1,28      | 0,93      | 2,13      | 1,38      | 0,44      | 0,76      | 0,00      | 0,40      | 0,00      |
| <i>Neogloboquadrina dutertrei</i>     | 0,00      | 0,00      | 0,00      | 0,00      | 0,00      | 0,00      | 0,00      | 0,60      | 0,00      | 0,00      |
| <i>Turborotalita quinqueloba</i>      | 5,74      | 11,06     | 8,33      | 7,23      | 15,60     | 7,56      | 4,92      | 12,57     | 4,74      | 4,93      |
| <i>Globigerinita glutinata</i>        | 0,82      | 2,55      | 1,85      | 1,28      | 2,29      | 2,22      | 1,52      | 0,60      | 0,79      | 1,35      |
| <i>Heliconoides inflatus</i>          | 16,22     | 9,52      | 12,12     | 12,86     | 15,15     | 16,15     | 16,46     | 8,70      | 11,29     | 9,92      |
| <i>Limacina retroversa</i>            | 0,00      | 0,00      | 0,00      | 0,00      | 0,00      | 0,00      | 0,00      | 0,00      | 0,00      | 0,00      |
| <i>Limacina trochiformis</i>          | 26,58     | 38,10     | 42,42     | 35,71     | 32,83     | 35,77     | 21,52     | 17,39     | 18,82     | 43,80     |
| <i>Boasia chierchiae</i>              | 9,01      | 13,33     | 7,58      | 4,29      | 10,61     | 8,46      | 6,96      | 29,35     | 9,68      | 6,61      |
| <i>Creseis acicula</i>                | 2,25      | 2,86      | 7,58      | 2,86      | 5,56      | 2,31      | 9,49      | 11,96     | 8,06      | 2,48      |
| <i>Styliola subula</i>                | 0,00      | 0,00      | 0,00      | 0,00      | 0,00      | 0,00      | 0,00      | 0,00      | 0,00      | 0,00      |
| <i>Clio cuspidata</i>                 | 0,90      | 0,95      | 0,00      | 1,43      | 0,51      | 0,00      | 0,63      | 1,09      | 1,08      | 2,48      |
| <i>Clio pyramidata</i>                | 5,86      | 7,62      | 10,61     | 11,43     | 4,55      | 3,08      | 7,59      | 5,43      | 5,91      | 4,96      |
| <i>Diacria trispinosa</i>             | 0,00      | 0,00      | 0,00      | 0,00      | 0,00      | 0,00      | 0,00      | 0,00      | 0,00      | 0,00      |
| <i>Cavolinia</i> spp.                 | 12,61     | 5,71      | 4,55      | 10,00     | 8,59      | 9,23      | 14,56     | 7,61      | 12,90     | 9,09      |

| <b>Species/Samples (cm)</b>           | <b>91</b> | <b>93</b> | <b>95</b> | <b>97</b> | <b>99</b> | <b>101</b> | <b>103</b> | <b>105</b> | <b>107</b> | <b>109</b> |
|---------------------------------------|-----------|-----------|-----------|-----------|-----------|------------|------------|------------|------------|------------|
| <i>Orbulina universa</i>              | 0,00      | 0,86      | 0,00      | 0,43      | 1,16      | 2,13       | 2,67       | 1,05       | 1,12       | 2,76       |
| <i>Globigerinoides ruber alba</i>     | 41,47     | 33,48     | 36,86     | 17,09     | 38,61     | 52,48      | 59,16      | 49,12      | 27,72      | 35,43      |
| <i>Globigerinoides ruber rosea</i>    | 20,74     | 14,59     | 15,29     | 31,62     | 15,83     | 2,48       | 5,34       | 11,93      | 13,11      | 14,57      |
| <i>Globigerinoides ruber</i>          | 0,46      | 3,86      | 0,78      | 0,00      | 1,54      | 3,19       | 1,15       | 3,51       | 2,62       | 1,97       |
| <i>Globorotalia inflata</i>           | 0,00      | 0,00      | 0,39      | 0,00      | 0,00      | 0,00       | 0,38       | 0,70       | 3,00       | 3,54       |
| <i>Globigerina bulloides</i> gr.      | 15,21     | 17,60     | 18,04     | 10,68     | 10,04     | 4,96       | 9,54       | 8,07       | 11,24      | 14,17      |
| <i>Globoturborotalita rubescens</i>   | 7,83      | 15,02     | 11,76     | 17,95     | 12,74     | 5,67       | 3,05       | 5,26       | 7,87       | 5,51       |
| <i>Globigerinella siphonifera</i> gr. | 3,69      | 2,58      | 3,53      | 2,14      | 3,47      | 10,28      | 8,40       | 3,86       | 10,86      | 1,57       |
| <i>Neogloboquadrina pachyderma</i>    | 0,46      | 0,43      | 1,18      | 0,43      | 0,77      | 0,00       | 0,76       | 0,70       | 1,50       | 3,15       |
| <i>Neogloboquadrina dutertrei</i>     | 0,00      | 0,00      | 0,00      | 0,00      | 0,00      | 0,00       | 0,00       | 0,35       | 0,37       | 0,39       |
| <i>Turborotalita quinqueloba</i>      | 6,45      | 9,44      | 9,41      | 18,38     | 13,13     | 22,34      | 11,83      | 15,44      | 23,22      | 15,35      |
| <i>Globigerinita glutinata</i>        | 3,23      | 2,15      | 2,75      | 1,28      | 1,54      | 0,35       | 0,38       | 1,75       | 0,75       | 1,18       |
| <i>Heliconoides inflatus</i>          | 7,08      | 9,66      | 7,84      | 10,22     | 5,78      | 9,33       | 4,58       | 2,53       | 0,00       | 13,64      |
| <i>Limacina retroversa</i>            | 0,00      | 0,00      | 0,00      | 0,00      | 0,00      | 0,00       | 0,00       | 0,00       | 0,00       | 0,00       |
| <i>Limacina trochiformis</i>          | 30,09     | 35,17     | 24,51     | 25,27     | 1,44      | 0,37       | 0,29       | 0,00       | 0,00       | 0,00       |
| <i>Boasia chierchiae</i>              | 10,62     | 6,90      | 20,59     | 7,53      | 37,18     | 33,21      | 39,26      | 37,97      | 0,00       | 38,64      |
| <i>Creseis acicula</i>                | 4,42      | 8,97      | 4,90      | 15,05     | 12,27     | 9,70       | 13,47      | 5,06       | 0,00       | 0,00       |
| <i>Styliola subula</i>                | 0,00      | 0,00      | 0,00      | 0,00      | 0,00      | 0,00       | 0,00       | 0,00       | 0,00       | 0,00       |
| <i>Clio cuspidata</i>                 | 0,00      | 0,69      | 0,00      | 0,00      | 0,72      | 0,75       | 1,72       | 2,53       | 0,00       | 0,00       |
| <i>Clio pyramidata</i>                | 7,96      | 6,90      | 6,86      | 2,15      | 4,69      | 6,34       | 4,58       | 7,59       | 0,00       | 0,00       |
| <i>Diacria trispinosa</i>             | 0,00      | 0,00      | 0,00      | 0,00      | 0,00      | 0,00       | 0,00       | 0,00       | 0,00       | 0,00       |
| <i>Cavolinia</i> spp.                 | 12,39     | 12,41     | 8,82      | 12,90     | 14,44     | 23,88      | 23,78      | 25,32      | 0,00       | 18,18      |

| <b>Species/Samples (cm)</b>           | <b>111</b> | <b>113</b> | <b>115</b> | <b>117</b> | <b>119</b> | <b>120,5</b> | <b>121,5</b> | <b>122,5</b> | <b>123,5</b> | <b>124,5</b> |
|---------------------------------------|------------|------------|------------|------------|------------|--------------|--------------|--------------|--------------|--------------|
| <i>Orbulina universa</i>              | 2,18       | 3,79       | 4,07       | 4,10       | 3,01       | 1,78         | 8,58         | 17,91        | 13,33        | 7,09         |
| <i>Globigerinoides ruber alba</i>     | 28,00      | 36,36      | 17,78      | 13,93      | 9,40       | 5,33         | 8,58         | 11,57        | 12,59        | 8,58         |
| <i>Globigerinoides ruber rosea</i>    | 13,09      | 7,95       | 14,44      | 14,75      | 15,79      | 5,78         | 9,33         | 14,93        | 18,52        | 16,42        |
| <i>Globigerinoides ruber</i>          | 3,64       | 2,27       | 1,85       | 0,00       | 1,88       | 0,00         | 2,24         | 2,61         | 4,07         | 1,49         |
| <i>Globorotalia inflata</i>           | 3,27       | 6,06       | 18,52      | 18,44      | 32,33      | 0,44         | 0,37         | 0,00         | 0,37         | 0,00         |
| <i>Globigerina bulloides</i> gr.      | 8,36       | 11,36      | 8,89       | 13,11      | 7,52       | 15,11        | 48,13        | 35,82        | 38,89        | 37,69        |
| <i>Globoturborotalita rubescens</i>   | 5,45       | 5,68       | 2,96       | 1,64       | 3,76       | 0,89         | 0,37         | 0,00         | 2,22         | 7,09         |
| <i>Globigerinella siphonifera</i> gr. | 3,27       | 3,41       | 2,96       | 2,46       | 4,14       | 0,89         | 3,36         | 7,09         | 3,70         | 3,73         |
| <i>Neogloboquadrina pachyderma</i>    | 3,27       | 1,89       | 13,33      | 16,39      | 7,89       | 0,00         | 0,37         | 0,00         | 0,37         | 0,00         |
| <i>Neogloboquadrina dutertrei</i>     | 0,73       | 0,00       | 0,37       | 0,00       | 1,13       | 0,00         | 0,00         | 0,37         | 0,00         | 0,00         |
| <i>Turborotalita quinqueloba</i>      | 26,18      | 20,08      | 14,81      | 11,89      | 13,53      | 68,44        | 18,66        | 9,70         | 5,56         | 17,54        |
| <i>Globigerinita glutinata</i>        | 1,09       | 0,38       | 0,00       | 1,23       | 0,75       | 0,89         | 0,00         | 0,00         | 0,37         | 0,00         |
| <i>Heliconoides inflatus</i>          | 5,26       | 3,13       | 7,14       | 5,88       | 15,00      | 13,95        | 15,91        | 0,00         | 29,33        | 4,65         |
| <i>Limacina retroversa</i>            | 0,00       | 0,00       | 0,00       | 0,00       | 0,00       | 0,00         | 0,00         | 0,00         | 0,00         | 0,00         |
| <i>Limacina trochiformis</i>          | 0,00       | 0,00       | 0,00       | 11,76      | 10,00      | 0,00         | 0,00         | 0,00         | 0,00         | 0,00         |
| <i>Boasia chierchiae</i>              | 15,79      | 51,56      | 71,43      | 52,94      | 25,00      | 46,51        | 46,59        | 0,00         | 18,67        | 62,79        |
| <i>Creseis acicula</i>                | 0,00       | 0,00       | 0,00       | 0,00       | 5,00       | 0,00         | 1,14         | 0,00         | 0,00         | 0,00         |
| <i>Styliola subula</i>                | 0,00       | 0,00       | 0,00       | 0,00       | 0,00       | 0,00         | 0,00         | 0,00         | 0,00         | 0,00         |
| <i>Clio cuspidata</i>                 | 5,26       | 3,13       | 0,00       | 0,00       | 0,00       | 0,00         | 0,00         | 0,00         | 0,00         | 0,00         |
| <i>Clio pyramidata</i>                | 3,51       | 3,13       | 0,00       | 0,00       | 5,00       | 0,00         | 0,00         | 0,00         | 1,33         | 0,00         |
| <i>Diacria trispinosa</i>             | 0,00       | 0,00       | 0,00       | 0,00       | 0,00       | 2,33         | 3,41         | 0,00         | 0,00         | 4,65         |
| <i>Cavolinia</i> spp.                 | 15,79      | 18,75      | 7,14       | 5,88       | 15,00      | 20,93        | 18,18        | 0,00         | 8,00         | 9,30         |

| <b>Species/Samples (cm)</b>           | <b>125,5</b> | <b>126,5</b> | <b>127,5</b> | <b>128,5</b> | <b>129,5</b> | <b>130,5</b> | <b>131,5</b> | <b>132,5</b> | <b>133,5</b> | <b>134,5</b> |
|---------------------------------------|--------------|--------------|--------------|--------------|--------------|--------------|--------------|--------------|--------------|--------------|
| <i>Orbulina universa</i>              | 4,71         | 6,02         | 4,55         | 2,80         | 3,04         | 1,13         | 4,76         | 8,90         | 7,50         | 2,78         |
| <i>Globigerinoides ruber alba</i>     | 4,31         | 4,14         | 14,46        | 16,78        | 7,60         | 7,89         | 5,13         | 8,19         | 3,57         | 3,97         |
| <i>Globigerinoides ruber rosea</i>    | 8,63         | 6,39         | 10,74        | 12,94        | 6,08         | 5,26         | 14,29        | 14,59        | 12,86        | 10,32        |
| <i>Globigerinoides ruber</i>          | 0,78         | 0,00         | 1,65         | 1,75         | 1,90         | 0,75         | 0,73         | 5,34         | 6,07         | 1,59         |
| <i>Globorotalia inflata</i>           | 0,00         | 0,00         | 0,00         | 0,35         | 0,00         | 0,00         | 0,00         | 0,00         | 0,00         | 0,00         |
| <i>Globigerina bulloides</i> gr.      | 40,39        | 37,22        | 42,56        | 26,22        | 12,17        | 16,92        | 11,72        | 16,73        | 10,71        | 10,71        |
| <i>Globoturborotalita rubescens</i>   | 5,10         | 2,63         | 2,48         | 3,15         | 3,04         | 2,26         | 1,47         | 1,78         | 0,71         | 2,38         |
| <i>Globigerinella siphonifera</i> gr. | 1,96         | 3,76         | 2,89         | 4,55         | 4,94         | 1,88         | 4,40         | 8,90         | 7,14         | 0,79         |
| <i>Neogloboquadrina pachyderma</i>    | 0,78         | 0,00         | 2,07         | 1,05         | 0,38         | 0,38         | 0,00         | 0,00         | 0,00         | 0,00         |
| <i>Neogloboquadrina dutertrei</i>     | 0,00         | 0,00         | 1,24         | 0,00         | 0,00         | 0,00         | 0,73         | 1,42         | 0,00         | 0,40         |
| <i>Turborotalita quinqueloba</i>      | 32,55        | 37,97        | 16,94        | 30,07        | 60,46        | 62,41        | 57,88        | 35,59        | 53,93        | 66,67        |
| <i>Globigerinita glutinata</i>        | 0,78         | 0,75         | 0,41         | 1,05         | 1,52         | 0,75         | 0,00         | 0,36         | 0,00         | 0,40         |
| <i>Heliconoides inflatus</i>          | 20,43        | 19,54        | 28,89        | 23,33        | 34,48        | 40,63        | 40,23        | 50,00        | 12,33        | 9,68         |
| <i>Limacina retroversa</i>            | 0,00         | 0,00         | 0,00         | 0,00         | 0,00         | 0,00         | 0,00         | 0,00         | 0,00         | 0,00         |
| <i>Limacina trochiformis</i>          | 0,00         | 0,00         | 0,74         | 0,00         | 0,00         | 3,13         | 0,00         | 0,00         | 0,00         | 3,23         |
| <i>Boasia chierchiae</i>              | 40,86        | 47,13        | 23,70        | 43,33        | 58,62        | 15,63        | 10,34        | 20,73        | 35,62        | 38,71        |
| <i>Creseis acicula</i>                | 0,00         | 0,00         | 0,00         | 0,00         | 0,00         | 0,00         | 0,00         | 0,00         | 0,00         | 0,00         |
| <i>Styliola subula</i>                | 0,00         | 0,00         | 0,00         | 0,00         | 0,00         | 0,00         | 0,00         | 0,00         | 0,00         | 0,00         |
| <i>Clio cuspidata</i>                 | 0,00         | 0,00         | 0,00         | 0,00         | 0,00         | 0,00         | 0,00         | 0,00         | 0,00         | 0,00         |
| <i>Clio pyramidata</i>                | 0,00         | 0,00         | 0,00         | 0,00         | 0,00         | 0,00         | 0,00         | 0,00         | 0,00         | 0,00         |
| <i>Diacria trispinosa</i>             | 5,38         | 3,45         | 6,67         | 3,33         | 0,00         | 0,00         | 0,00         | 0,00         | 0,00         | 0,00         |
| <i>Cavolinia</i> spp.                 | 4,30         | 12,64        | 8,89         | 10,00        | 3,45         | 3,13         | 2,30         | 4,88         | 13,70        | 3,23         |



| <b>Species/Samples (cm)</b>           | <b>135,5</b> | <b>136,5</b> | <b>137,5</b> | <b>138,5</b> | <b>139,5</b> | <b>140,5</b> | <b>141,5</b> | <b>142,5</b> | <b>143,5</b> | <b>144,5</b> |
|---------------------------------------|--------------|--------------|--------------|--------------|--------------|--------------|--------------|--------------|--------------|--------------|
| <i>Orbulina universa</i>              | 2,92         | 3,65         | 7,38         | 6,92         | 6,99         | 12,21        | 22,18        | 13,31        | 9,42         | 4,83         |
| <i>Globigerinoides ruber alba</i>     | 4,58         | 1,09         | 3,32         | 5,00         | 5,51         | 7,25         | 11,28        | 10,08        | 13,41        | 7,43         |
| <i>Globigerinoides ruber rosea</i>    | 8,75         | 8,76         | 10,33        | 9,62         | 4,78         | 10,69        | 13,62        | 13,71        | 8,33         | 10,78        |
| <i>Globigerinoides ruber</i>          | 0,83         | 0,73         | 1,11         | 0,38         | 0,00         | 0,76         | 0,39         | 0,00         | 0,00         | 0,00         |
| <i>Globorotalia inflata</i>           | 0,42         | 0,00         | 0,37         | 0,00         | 0,37         | 0,38         | 0,00         | 0,00         | 0,36         | 0,00         |
| <i>Globigerina bulloides</i> gr.      | 9,58         | 10,22        | 9,59         | 11,15        | 13,24        | 12,60        | 10,51        | 12,10        | 6,88         | 9,67         |
| <i>Globoturborotalita rubescens</i>   | 0,42         | 3,65         | 1,85         | 3,85         | 5,15         | 5,34         | 5,84         | 7,66         | 2,54         | 13,75        |
| <i>Globigerinella siphonifera</i> gr. | 3,75         | 6,93         | 6,27         | 3,46         | 2,21         | 3,05         | 5,06         | 3,63         | 6,16         | 0,74         |
| <i>Neogloboquadrina pachyderma</i>    | 0,42         | 0,36         | 0,74         | 0,38         | 0,37         | 0,00         | 0,00         | 0,00         | 0,00         | 0,74         |
| <i>Neogloboquadrina dutertrei</i>     | 0,00         | 0,36         | 0,00         | 0,00         | 0,37         | 0,38         | 1,56         | 0,81         | 0,36         | 0,00         |
| <i>Turborotalita quinqueloba</i>      | 67,08        | 63,87        | 58,30        | 59,23        | 61,03        | 47,33        | 29,57        | 37,50        | 52,54        | 52,04        |
| <i>Globigerinita glutinata</i>        | 0,83         | 0,36         | 0,37         | 0,00         | 0,00         | 0,00         | 0,00         | 0,81         | 0,00         | 0,00         |
| <i>Heliconoides inflatus</i>          | 4,62         | 0,00         | 5,36         | 5,56         | 29,69        | 0,00         | 0,00         | 0,00         | 0,00         | 54,17        |
| <i>Limacina retroversa</i>            | 0,00         | 0,00         | 0,00         | 0,00         | 0,00         | 0,00         | 0,00         | 0,00         | 0,00         | 0,00         |
| <i>Limacina trochiformis</i>          | 0,00         | 0,00         | 1,79         | 0,00         | 0,00         | 0,00         | 0,00         | 0,00         | 0,00         | 4,17         |
| <i>Boasia chierchiae</i>              | 56,92        | 55,10        | 35,71        | 11,11        | 50,00        | 55,56        | 0,00         | 0,00         | 0,00         | 0,00         |
| <i>Creseis acicula</i>                | 0,00         | 0,00         | 1,79         | 0,00         | 0,00         | 22,22        | 0,00         | 0,00         | 0,00         | 0,00         |
| <i>Styliola subula</i>                | 0,00         | 0,00         | 0,00         | 0,00         | 0,00         | 0,00         | 0,00         | 0,00         | 0,00         | 0,00         |
| <i>Clio cuspidata</i>                 | 0,00         | 0,00         | 0,00         | 0,00         | 0,00         | 0,00         | 0,00         | 0,00         | 0,00         | 0,00         |
| <i>Clio pyramidata</i>                | 3,08         | 0,00         | 0,00         | 0,00         | 6,25         | 0,00         | 0,00         | 0,00         | 0,00         | 0,00         |
| <i>Diacria trispinosa</i>             | 1,54         | 2,04         | 1,79         | 0,00         | 0,00         | 11,11        | 0,00         | 0,00         | 0,00         | 0,00         |
| <i>Cavolinia</i> spp.                 | 6,15         | 16,33        | 21,43        | 11,11        | 4,69         | 11,11        | 0,00         | 0,00         | 0,00         | 4,17         |

| <b>Species/Samples (cm)</b>           | <b>145,5</b> | <b>146,5</b> | <b>147,5</b> | <b>148,5</b> | <b>149,5</b> | <b>150,5</b> | <b>151,5</b> | <b>152,5</b> | <b>153,5</b> | <b>154,5</b> |
|---------------------------------------|--------------|--------------|--------------|--------------|--------------|--------------|--------------|--------------|--------------|--------------|
| <i>Orbulina universa</i>              | 5,88         | 19,91        | 13,70        | 6,23         | 3,68         | 9,58         | 25,97        | 27,45        | 7,66         | 12,63        |
| <i>Globigerinoides ruber alba</i>     | 11,03        | 8,33         | 11,85        | 12,46        | 7,72         | 4,98         | 9,52         | 13,33        | 6,93         | 8,07         |
| <i>Globigerinoides ruber rosea</i>    | 14,34        | 20,37        | 24,81        | 25,61        | 13,24        | 7,28         | 12,99        | 12,94        | 6,57         | 13,33        |
| <i>Globigerinoides ruber</i>          | 0,00         | 0,00         | 0,00         | 0,00         | 0,00         | 0,00         | 0,00         | 0,00         | 0,00         | 0,00         |
| <i>Globorotalia inflata</i>           | 0,37         | 0,00         | 0,00         | 0,00         | 0,00         | 0,00         | 0,00         | 0,00         | 0,00         | 0,00         |
| <i>Globigerina bulloides</i> gr.      | 22,06        | 23,61        | 24,81        | 18,34        | 22,06        | 21,84        | 14,72        | 16,47        | 16,79        | 18,60        |
| <i>Globoturborotalita rubescens</i>   | 7,35         | 10,65        | 8,52         | 22,84        | 20,59        | 15,71        | 9,09         | 7,45         | 7,66         | 4,91         |
| <i>Globigerinella siphonifera</i> gr. | 3,68         | 3,70         | 5,19         | 3,46         | 2,21         | 3,07         | 5,19         | 4,31         | 0,00         | 1,40         |
| <i>Neogloboquadrina pachyderma</i>    | 0,00         | 0,00         | 0,00         | 0,00         | 0,37         | 0,00         | 0,00         | 0,00         | 0,00         | 0,00         |
| <i>Neogloboquadrina dutertrei</i>     | 0,00         | 0,00         | 0,00         | 1,38         | 1,10         | 0,00         | 0,00         | 0,39         | 0,00         | 0,00         |
| <i>Turborotalita quinqueloba</i>      | 32,35        | 12,50        | 10,74        | 7,61         | 28,31        | 37,55        | 22,08        | 16,47        | 54,38        | 40,35        |
| <i>Globigerinita glutinata</i>        | 0,37         | 0,46         | 0,00         | 0,35         | 0,37         | 0,00         | 0,00         | 0,00         | 0,00         | 0,35         |
| <i>Heliconoides inflatus</i>          | 51,22        | 55,43        | 62,69        | 66,18        | 50,00        | 63,86        | 100,00       | 66,67        | 71,43        | 59,38        |
| <i>Limacina retroversa</i>            | 0,00         | 0,00         | 0,00         | 0,00         | 0,00         | 0,00         | 0,00         | 0,00         | 0,00         | 0,00         |
| <i>Limacina trochiformis</i>          | 0,00         | 0,00         | 0,00         | 0,00         | 0,00         | 0,00         | 0,00         | 0,00         | 0,00         | 0,00         |
| <i>Boasia chierchiae</i>              | 24,39        | 22,86        | 11,94        | 9,56         | 16,67        | 25,30        | 0,00         | 10,85        | 21,43        | 21,88        |
| <i>Creseis acicula</i>                | 0,00         | 1,14         | 0,00         | 0,00         | 0,00         | 0,00         | 0,00         | 0,00         | 0,00         | 0,00         |
| <i>Styliola subula</i>                | 0,00         | 0,00         | 0,00         | 0,00         | 0,00         | 0,00         | 0,00         | 0,00         | 0,00         | 0,00         |
| <i>Clio cuspidata</i>                 | 0,00         | 0,00         | 0,00         | 0,00         | 0,00         | 0,00         | 0,00         | 0,00         | 0,00         | 0,00         |
| <i>Clio pyramidata</i>                | 4,88         | 6,29         | 5,97         | 4,41         | 0,00         | 1,20         | 0,00         | 2,33         | 2,38         | 5,00         |
| <i>Diacria trispinosa</i>             | 0,00         | 2,86         | 0,75         | 0,74         | 0,00         | 0,00         | 0,00         | 4,65         | 0,00         | 0,00         |
| <i>Cavolinia</i> spp.                 | 2,44         | 0,57         | 5,22         | 4,41         | 0,00         | 0,00         | 0,00         | 1,55         | 0,00         | 1,88         |

| <b>Species/Samples (cm)</b>           | <b>155,5</b> | <b>156,5</b> | <b>158,5</b> | <b>159,5</b> | <b>160,5</b> | <b>161,5</b> | <b>162,5</b> | <b>163,5</b> | <b>164,5</b> | <b>165,5</b> |
|---------------------------------------|--------------|--------------|--------------|--------------|--------------|--------------|--------------|--------------|--------------|--------------|
| <i>Orbulina universa</i>              | 13,43        | 9,85         | 11,84        | 7,87         | 1,37         | 3,00         | 2,48         | 2,18         | 0,37         | 10,86        |
| <i>Globigerinoides ruber alba</i>     | 1,41         | 1,09         | 9,21         | 6,37         | 7,17         | 9,74         | 11,16        | 9,61         | 11,48        | 7,24         |
| <i>Globigerinoides ruber rosea</i>    | 4,59         | 1,82         | 5,26         | 11,99        | 8,53         | 14,98        | 4,55         | 0,44         | 1,48         | 0,45         |
| <i>Globigerinoides ruber</i>          | 0,00         | 0,00         | 0,00         | 0,00         | 0,00         | 0,00         | 0,00         | 0,00         | 0,00         | 1,81         |
| <i>Globorotalia inflata</i>           | 0,00         | 0,00         | 0,00         | 0,00         | 0,00         | 0,00         | 0,00         | 0,00         | 0,00         | 0,00         |
| <i>Globigerina bulloides</i> gr.      | 16,25        | 17,52        | 20,18        | 11,61        | 26,62        | 20,97        | 20,25        | 17,03        | 31,85        | 12,67        |
| <i>Globoturborotalita rubescens</i>   | 1,06         | 0,36         | 0,00         | 2,25         | 2,05         | 0,75         | 1,65         | 0,00         | 3,70         | 0,45         |
| <i>Globigerinella siphonifera</i> gr. | 1,06         | 1,46         | 5,26         | 4,12         | 3,41         | 5,62         | 9,50         | 3,06         | 1,85         | 3,62         |
| <i>Neogloboquadrina pachyderma</i>    | 0,00         | 0,00         | 0,44         | 0,00         | 0,00         | 0,00         | 0,00         | 0,00         | 0,00         | 0,00         |
| <i>Neogloboquadrina dutertrei</i>     | 0,00         | 0,00         | 0,00         | 1,87         | 0,00         | 0,37         | 0,00         | 0,87         | 3,33         | 0,90         |
| <i>Turborotalita quinqueloba</i>      | 61,48        | 67,15        | 48,25        | 53,93        | 50,17        | 44,57        | 48,76        | 65,07        | 44,07        | 61,09        |
| <i>Globigerinita glutinata</i>        | 0,71         | 0,73         | 0,44         | 1,12         | 1,37         | 1,12         | 1,65         | 1,75         | 1,85         | 0,90         |
| <i>Heliconoides inflatus</i>          | 33,33        | 79,17        | 57,94        | 68,46        | 38,46        | 31,82        | 23,81        | 47,83        | 57,14        | 15,28        |
| <i>Limacina retroversa</i>            | 0,00         | 0,00         | 0,00         | 0,00         | 0,00         | 0,00         | 0,00         | 0,00         | 0,00         | 0,00         |
| <i>Limacina trochiformis</i>          | 0,00         | 0,00         | 0,00         | 0,00         | 0,00         | 0,00         | 0,00         | 0,00         | 0,00         | 0,00         |
| <i>Boasia chierchiae</i>              | 66,67        | 12,50        | 25,23        | 6,92         | 0,00         | 22,73        | 4,76         | 7,25         | 14,29        | 25,00        |
| <i>Creseis acicula</i>                | 0,00         | 8,33         | 4,67         | 3,08         | 15,38        | 4,55         | 14,29        | 15,94        | 9,52         | 33,33        |
| <i>Styliola subula</i>                | 0,00         | 0,00         | 0,00         | 0,00         | 0,00         | 0,00         | 0,00         | 0,00         | 0,00         | 0,00         |
| <i>Clio cuspidata</i>                 | 0,00         | 0,00         | 0,00         | 0,00         | 0,00         | 0,00         | 0,00         | 0,00         | 0,00         | 0,00         |
| <i>Clio pyramidata</i>                | 0,00         | 0,00         | 1,87         | 3,85         | 0,00         | 0,00         | 0,00         | 3,62         | 4,76         | 2,78         |
| <i>Diacria trispinosa</i>             | 0,00         | 0,00         | 4,67         | 10,77        | 7,69         | 0,00         | 9,52         | 6,52         | 4,76         | 1,39         |
| <i>Cavolinia</i> spp.                 | 0,00         | 0,00         | 0,00         | 2,31         | 15,38        | 9,09         | 9,52         | 1,45         | 0,00         | 5,56         |

| <b>Species/Samples (cm)</b>           | <b>166,5</b> | <b>168</b> | <b>170</b> | <b>172</b> | <b>173,5</b> |
|---------------------------------------|--------------|------------|------------|------------|--------------|
| <i>Orbulina universa</i>              | 11,19        | 10,15      | 4,96       | 2,01       | 0,00         |
| <i>Globigerinoides ruber alba</i>     | 35,82        | 30,08      | 35,88      | 27,71      | 18,88        |
| <i>Globigerinoides ruber rosea</i>    | 1,49         | 3,38       | 3,44       | 2,81       | 3,21         |
| <i>Globigerinoides ruber</i>          | 1,12         | 0,75       | 1,53       | 0,40       | 0,00         |
| <i>Globorotalia inflata</i>           | 0,00         | 0,00       | 0,38       | 0,00       | 0,00         |
| <i>Globigerina bulloides</i> gr.      | 25,75        | 28,20      | 23,28      | 16,06      | 29,72        |
| <i>Globoturborotalita rubescens</i>   | 1,87         | 0,38       | 3,82       | 4,42       | 13,65        |
| <i>Globigerinella siphonifera</i> gr. | 2,99         | 3,76       | 0,76       | 0,40       | 0,00         |
| <i>Neogloboquadrina pachyderma</i>    | 0,00         | 0,00       | 0,00       | 0,00       | 0,00         |
| <i>Neogloboquadrina dutertrei</i>     | 0,00         | 1,50       | 1,15       | 1,61       | 0,00         |
| <i>Turborotalita quinqueloba</i>      | 17,16        | 18,42      | 14,89      | 34,14      | 22,09        |
| <i>Globigerinita glutinata</i>        | 2,61         | 4,89       | 9,92       | 10,44      | 12,45        |
| <i>Heliconoides inflatus</i>          | 32,73        | 6,00       | 4,08       | 10,29      | 0,00         |
| <i>Limacina retroversa</i>            | 0,00         | 0,00       | 0,00       | 0,00       | 0,00         |
| <i>Limacina trochiformis</i>          | 0,91         | 0,00       | 0,00       | 0,00       | 0,00         |
| <i>Boasia chierchiae</i>              | 5,45         | 0,00       | 3,06       | 1,47       | 0,89         |
| <i>Creseis acicula</i>                | 20,00        | 49,33      | 38,78      | 30,88      | 27,68        |
| <i>Styliola subula</i>                | 0,00         | 0,00       | 0,00       | 0,00       | 0,00         |
| <i>Clio cuspidata</i>                 | 0,00         | 0,00       | 0,00       | 0,00       | 0,00         |
| <i>Clio pyramidata</i>                | 12,73        | 19,33      | 15,31      | 13,24      | 8,04         |
| <i>Diacria trispinosa</i>             | 22,73        | 21,33      | 38,78      | 44,12      | 60,71        |
| <i>Cavolinia</i> spp.                 | 0,00         | 0,00       | 0,00       | 0,00       | 0,00         |
